# Supplementary material for: Single-Cell Glia and Neuron Gene Expression in the Central Amygdala in Opioid Withdrawal Suggests Inflammation With Correlated Gut Dysbiosis
Source: Front Neurosci. 2019 Jul 3;13:665. doi: 10.3389/fnins.2019.00665 (PMC6619439; doi:10.3389/fnins.2019.00665)
Supplement: TABLE S3 — PCA and LDA centroids and distances. [file Table_3.XLSX]

## Sheet: Sheet1
	Principle Component Analysis													Linear Discriminate Analysis
	Centroid Points													Centroid Points
	All			Neurons			Microglia			Astrocytes				All			Neurons			Microglia			Astrocytes
Treatment	PC2 Mean	PC3 Mean		PC2 Mean	PC3 Mean		PC2 Mean	PC3 Mean		PC2 Mean	PC3 Mean			LD1 Mean	LD2 Mean		LD1 Mean	LD2 Mean		LD1 Mean	LD2 Mean		LD1 Mean	LD2 Mean
Placebo	2.23274	0.146121		3.98162	0.444609		2.20663	1.34586		-0.596927	3.23989			-0.799954	-0.560529		-0.998179	0.0115791		-1.16103	-0.424015		-1.36138	-0.0165544
Morphine	0.986405	-0.290953		3.06855	0.889547		0.629354	3.36576		-0.848802	2.98966			-0.698888	-0.0373855		-0.920626	0.600531		-0.74019	0.701453		-1.28	0.461705
Withdrawal	-3.99392	0.97472		-2.28212	3.00825		-5.42935	1.71508		-3.52846	-0.331011			1.40302	-0.290654		0.950483	0.301187		1.82198	0.00861581		0.936079	0.260884
	Absolute Distance Between Centroids													Absolute Distance Between Centroids
	All			Neurons			Microglia			Astrocytes				All			Neurons			Microglia			Astrocytes
PvM	1.32075			1.0157			2.56277			0.355041				0.532816			0.594036			1.20158			0.485135
PvW	6.28155			6.76806			7.75368			4.62008				2.21944			1.97006			3.01423			2.31415
MvW	5.13863			5.75488			6.27954			4.26701				2.11711			1.8949			2.6542			2.22515
Normalization Factor	0.757144			0.984541			0.390202			2.81657				1.87682			1.6834			0.832239			2.06128
	Normalized Distance Between Centroids													Normalized Distance Between Centroids
	All			Neurons			Microglia			Astrocytes				All			Neurons			Microglia			Astrocytes
PvM	1			1			1			1				1			1			1			1
PvW	4.75604			6.66343			3.02551			13.0128				4.16549			3.31641			2.50856			4.77012
MvW	3.89069			5.66591			2.45029			12.0184				3.97343			3.18988			2.20893			4.58668
	Distances Between Samples and Centroids													Distances Between Samples and Centroids
	All			Neurons			Microglia			Astrocytes				All			Neurons			Microglia			Astrocytes
	Mean	Median		Mean	Median		Mean	Median		Mean	Median			Mean	Median		Mean	Median		Mean	Median		Mean	Median
PvP	4.77847	4.81383		4.68225	4.216		4.4127	4.0952		4.29741	4.0264			1.26865	1.14718		1.32269	1.27974		1.3703	1.27968		1.00308	0.895943
PvM	5.0522	4.85331		4.86315	4.84019		5.13174	5.21676		4.31664	3.91508			1.37468	1.37708		1.45679	1.46268		1.72545	1.42136		1.10666	1.13436
PvW	7.55715	7.59594		7.98311	8.46696		8.40875	8.67163		5.93926	6.44062			2.50342	2.47195		2.20447	2.42431		3.25728	3.33875		2.43273	2.33842
MvP	4.51447	4.13454		3.9464	3.21748		4.53251	3.9537		4.66481	4.26621			1.2889	1.27164		1.31074	1.10103		1.62359	1.73037		1.28444	1.16662
MvM	4.5015	4.32284		3.89116	3.29426		4.10809	3.34285		4.65546	4.29992			1.1971	1.15835		1.20641	1.0478		1.13189	0.999168		1.2141	1.11661
MvW	6.70679	6.85249		6.80426	6.45155		7.55195	7.76943		6.10608	5.78883			2.32958	2.46486		2.25773	2.27666		2.82006	2.83015		2.44502	2.43969
WvP	7.47872	6.85406		7.8451	7.24678		8.12283	8.45103		6.06969	5.1796			2.4837	2.28923		2.17724	2.01797		3.15715	3.1519		2.6064	2.57831
WvM	6.54338	5.86222		6.98964	6.42106		6.86848	7.66722		5.79342	4.86115			2.39648	2.2775		2.1143	1.77781		2.77771	2.62894		2.55681	2.5921
WvW	4.16711	3.77153		4.48447	4.30322		3.5082	3.66984		3.71529	2.3391			1.26913	1.05611		1.22572	1.09336		1.11604	1.01254		1.34328	1.35559
	Distances Between Samples and Centroids													Distances Between Samples and Centroids
	All			Neurons			Microglia			Astrocytes				All			Neurons			Microglia			Astrocytes
	Mean	Median		Mean	Median		Mean	Median		Mean	Median			Mean	Median		Mean	Median		Mean	Median		Mean	Median
PvP	4.77847	4.81383		4.68225	4.216		4.4127	4.0952		4.29741	4.0264			1.26865	1.14718		1.32269	1.27974		1.3703	1.27968		1.00308	0.895943
MvP	4.51447	4.13454		3.9464	3.21748		4.53251	3.9537		4.66481	4.26621			1.2889	1.27164		1.31074	1.10103		1.62359	1.73037		1.28444	1.16662
WvP	7.47872	6.85406		7.8451	7.24678		8.12283	8.45103		6.06969	5.1796			2.4837	2.28923		2.17724	2.01797		3.15715	3.1519		2.6064	2.57831
PvM	5.0522	4.85331		4.86315	4.84019		5.13174	5.21676		4.31664	3.91508			1.37468	1.37708		1.45679	1.46268		1.72545	1.42136		1.10666	1.13436
MvM	4.5015	4.32284		3.89116	3.29426		4.10809	3.34285		4.65546	4.29992			1.1971	1.15835		1.20641	1.0478		1.13189	0.999168		1.2141	1.11661
WvM	6.54338	5.86222		6.98964	6.42106		6.86848	7.66722		5.79342	4.86115			2.39648	2.2775		2.1143	1.77781		2.77771	2.62894		2.55681	2.5921
PvW	7.55715	7.59594		7.98311	8.46696		8.40875	8.67163		5.93926	6.44062			2.50342	2.47195		2.20447	2.42431		3.25728	3.33875		2.43273	2.33842
MvW	6.70679	6.85249		6.80426	6.45155		7.55195	7.76943		6.10608	5.78883			2.32958	2.46486		2.25773	2.27666		2.82006	2.83015		2.44502	2.43969
WvW	4.16711	3.77153		4.48447	4.30322		3.5082	3.66984		3.71529	2.3391			1.26913	1.05611		1.22572	1.09336		1.11604	1.01254		1.34328	1.35559
